# Supplementary material for: The impact of side and top arm techniques during the backstroke breakout phase on 15-meter swimming performance
Source: PeerJ. 2025 Jan 15;13:e18838. doi: 10.7717/peerj.18838 (PMC11748401; doi:10.7717/peerj.18838)
Supplement: Supplemental Information 1 [file peerj-13-18838-s001.xlsx]

## Sheet: Sheet1
Number	S1-V	S2-V	S3-V	15-T	M2-IN	M2-SA	M2-EA	M2-TA	M2-BA
1	1.96935	1.32361	1.84768	7.71	6.6	-37.3	122.8	13.7	5.6
2	1.9381	1.69012	1.8513	7.86	11.9	-29.1	118.9	2.4	1.6
3	1.95092	1.77431	1.7116	8.08	0.7	-23.7	104.2	11	2.5
4	1.95445	1.77507	1.84877	7.85	2.1	-24.4	118.3	2.2	6
5	1.83819	1.18778	1.54194	8.41	24.4	-37.1	111.3	5.9	0.9
6	1.82247	1.15471	1.43077	8.51	10.4	-36.6	119.5	6.3	4.8
7	1.84352	1.3574	1.62032	8.58	12.3	-38.7	105.5	7.5	5.5
8	1.88925	1.41767	1.54545	8.34	-1.4	-31.8	124.5	9.7	8.5
9	1.78138	1.27015	1.6701	8.06	24.6	-24.8	121.9	11.6	2.7
10	1.81023	1.31221	1.79111	8.31	20.4	-32.7	120.5	1.2	-0.8
11	1.77573	1.40022	1.43333	8.91	17.5	-47.7	130.2	4.3	12.9
12	1.79867	1.48273	1.36039	9.09	7.9	-53.4	98.4	1.6	6.8
13	1.70092	1.3141	1.62241	8.93	15.5	-55.7	113.9	8.5	-1.8
14	1.7405	1.03863	1.49	9.05	10.1	-43.5	128.7	24.1	17.8
15	1.51289	1.0492	1.75494	9.51	21.3	-48.4	111.2	10.7	16.5
16	2.0092	1.57616	1.71038	8.01	5.1	-26.6	102.7	11.3	9.6
Number	S1-V	S2-V	S3-V	15-T	M2-IN	M2-SA	M2-EA	M2-TA	M2-BA
1	1.98901	1.80881	1.84348	7.52	82.9	100.6	118.3	9.9	9.6
2	1.94675	2.03078	1.85338	7.73	71.6	104.9	92.4	4.1	-6.3
3	1.93515	1.88705	1.83706	7.91	66.5	108.3	94.4	2.7	4.1
4	1.92292	1.55718	1.76358	8.06	51.3	118.1	126.6	-4.7	-6.4
5	1.86127	1.58193	1.31193	8.01	38.9	96.2	88.8	6.3	1.7
6	1.82702	1.26657	1.44103	8.02	80.5	104.5	112.1	10.3	4.6
7	1.82178	1.43975	1.57792	8.61	65.7	100.5	131.5	9.9	7.5
8	1.89134	1.70838	1.42135	8.13	25.5	105.1	90.7	2.6	-10.5
9	1.72674	1.50635	1.50455	8.17	56.3	105.5	86.6	14.3	2.2
10	1.81531	1.53818	1.78341	8.18	85.6	109.1	104.2	4.9	-5.1
11	1.79327	1.67195	1.79474	8.14	72.9	124.1	113.5	8.1	8.8
12	1.78615	1.58543	1.68481	8.4	16.8	114.9	78.1	-5.7	-15.3
13	1.68789	1.39228	1.6087	8.93	37.9	92.5	102.7	3.6	-10.1
14	1.75945	1.22026	1.43373	9.14	69.1	133.3	120.3	9.1	-3.5
15	1.60258	1.42176	1.51984	9.49	42.1	81.9	117.8	1.1	-13.2
16	2.02924	1.61159	1.62191	7.96	32	106.1	92.5	7.4	-2
